# Supplementary material for: Effect of aging on pulmonary cellular responses during mechanical ventilation
Source: JCI journal article supplement (doi:10.1172/jci.insight.185834), 2025-02-13
Supplement: sd1 [file 1]

## Supplemental Material

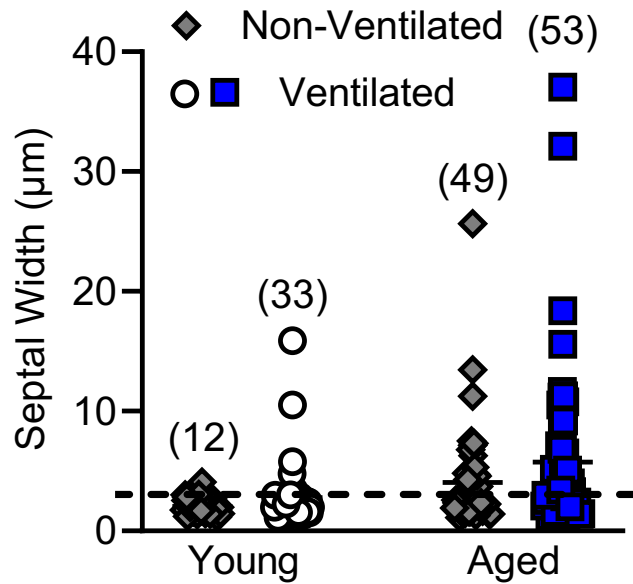

**S. Fig 1** Assessment of alveolar septal width in lung histology sections from young and aged non-ventilated and ventilated mice. An increase in septal width and a greater number of thickened septa were observed following ventilation, as well as with age. Dashed line indicates 2.6  $\mu\text{m}$ , the threshold value chosen to delineate a thickened alveolar septum, based on values obtained from the young non-ventilated animals. The numbers in the brackets represent the number of regions that fall over the 2.6  $\mu\text{m}$  threshold value. A total of 12 histology sections were used per animal, with 4-5 animals per group.

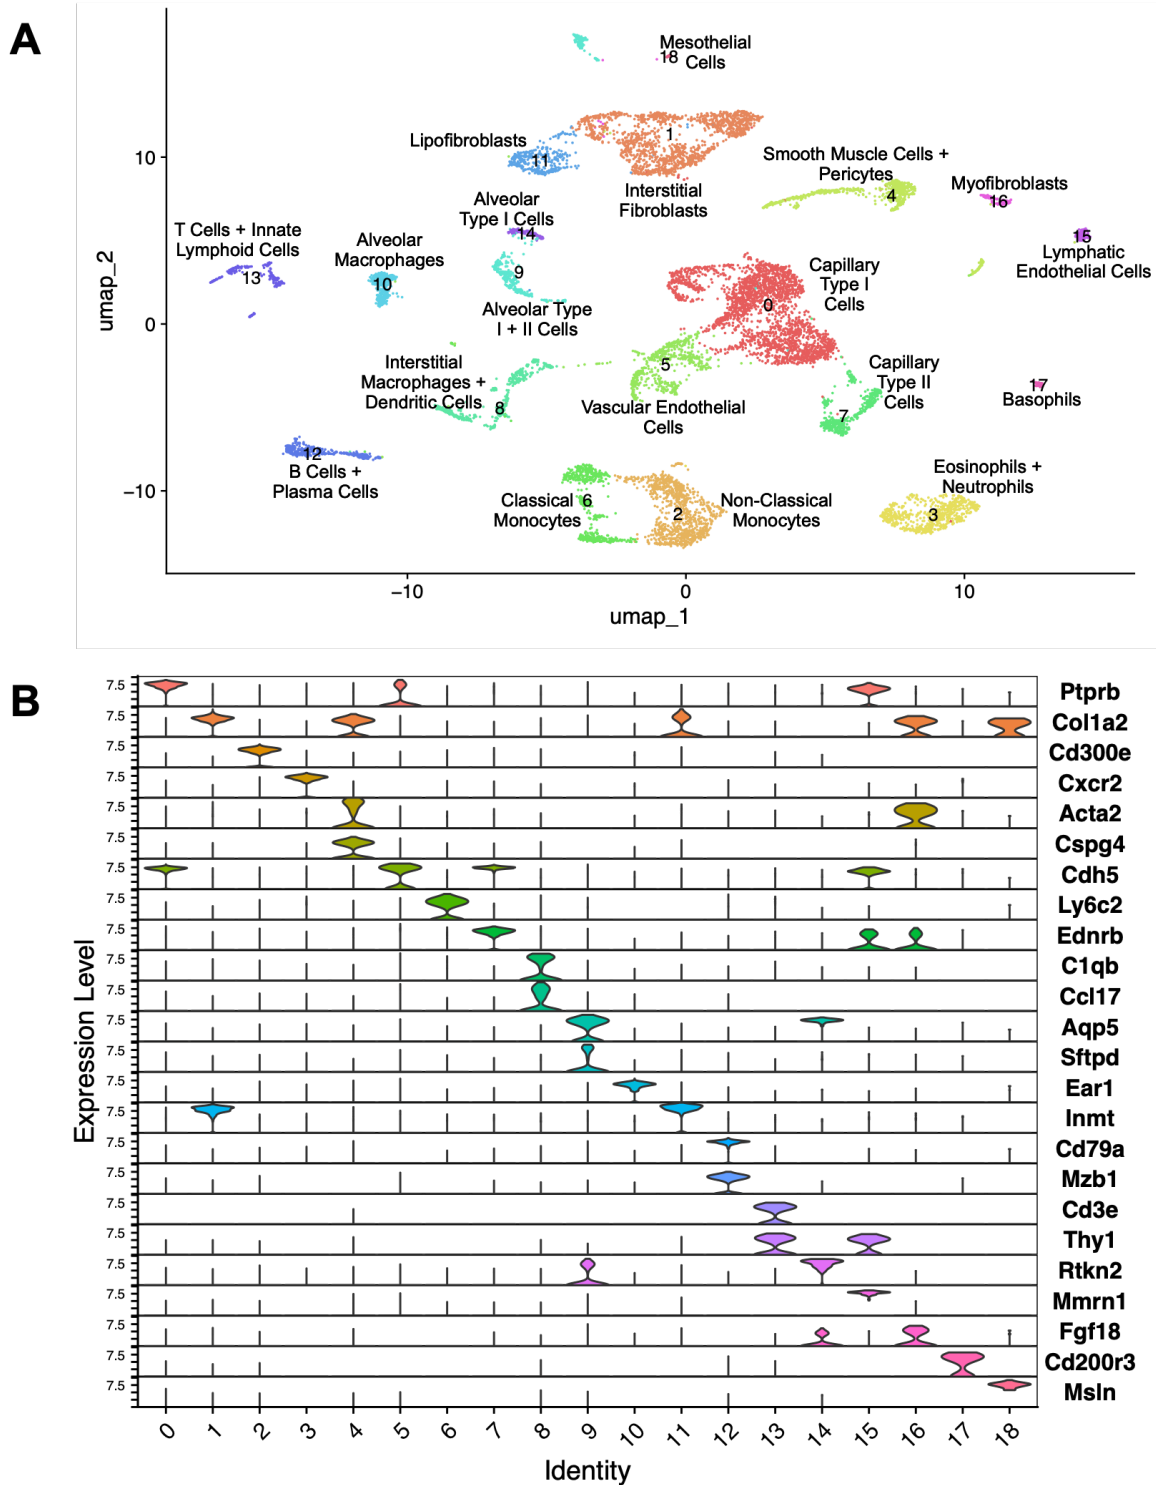

**S. Fig 2** Cell identification of single-cell RNA sequencing data of lung tissue from young and aged non-ventilated and ventilated mice. The Uniform Manifold Approximation and Projection (UMAP) visualization of the unsupervised transcriptome clustering; a total of 19 unique clusters were identified (A). The stacked violin plot displays the relative expression levels of cells expressing selected marker genes based on unique molecular identifier (UMI) counts (B).

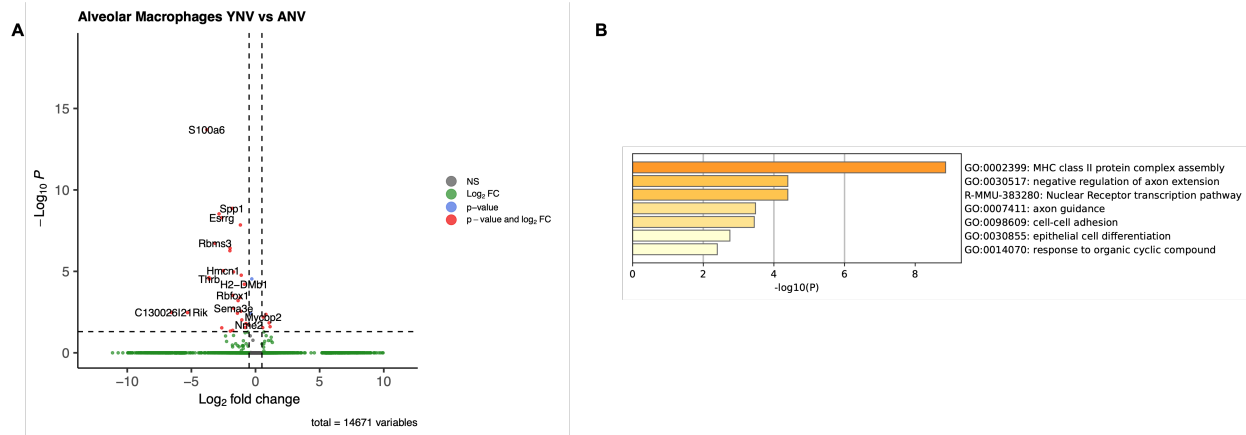

**S. Fig 3** Basal differences in expressed genes between the alveolar macrophages from young (YNV) and aged non-ventilated (ANV) mice. The volcano plot reveals 34 significantly differentially expressed genes, most of which are upregulated in the cells from aged non-ventilated animals compared to young non-ventilated animals (**A**). The heat map highlights a number of pathways associated with activation and cell-cell adhesion, based on the differentially expressed genes (**B**). Datasets were derived from  $n = 3$  animals pooled per group.

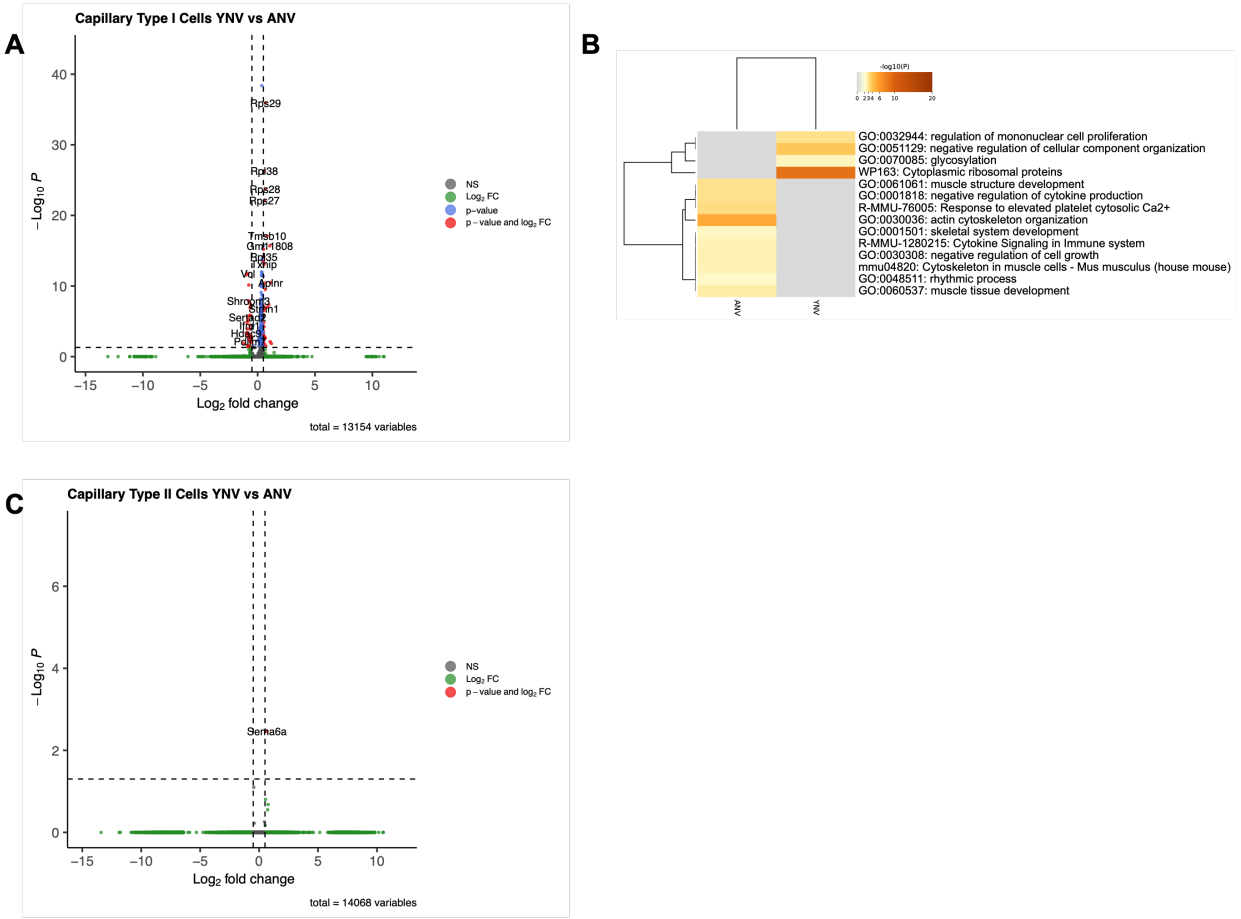

**S. Fig 4** Basal differences in expressed genes between the capillary type I and type II cells from young (YNV) and aged non-ventilated (ANV) mice. The volcano plot reveals 64 significantly differentially expressed genes in the capillary type I cells from young non-ventilated animals compared to aged non-ventilated animals (**A**). The heatmap highlights a number of pathways describing alterations in signaling associated with the actin cytoskeleton, cytoplasmic ribosomal proteins, and inflammation, based on the differentially expressed genes (**B**). Just one differentially expressed gene was observed in the capillary type II cells between young and aged non-ventilated animals (**C**); heatmap data could not be produced from this. Datasets were derived from  $n = 3$  animals pooled per group.
